CORRECTION

# Correction: Individualized Homeopathic Treatment and Fluoxetine for Moderate to Severe Depression in Peri- and Postmenopausal Women (HOMDEP-MENOP Study): A Randomized, Double-Dummy, Double-Blind, Placebo-Controlled Trial

The *PLOS ONE* Staff

In the Abstract, the link to the trial registration is incorrect. The correct link is: <https://clinicaltrials.gov/ct2/show/NCT01635218>. The publisher apologizes for the error.

## Reference

1. Macías-Cortés EdC, Llanes-González L, Aguilar-Faisal L, Asbun-Bojalil J (2015) Individualized Homeopathic Treatment and Fluoxetine for Moderate to Severe Depression in Peri- and Postmenopausal Women (HOMDEP-MENOP Study): A Randomized, Double-Dummy, Double-Blind, Placebo-Controlled Trial. *PLoS ONE* 10(3): e0118440. doi: [10.1371/journal.pone.0118440](https://doi.org/10.1371/journal.pone.0118440) PMID: [25768800](https://pubmed.ncbi.nlm.nih.gov/25768800/)

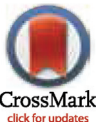

## OPEN ACCESS

**Citation:** The *PLOS ONE* Staff (2015) Correction: Individualized Homeopathic Treatment and Fluoxetine for Moderate to Severe Depression in Peri- and Postmenopausal Women (HOMDEP-MENOP Study): A Randomized, Double-Dummy, Double-Blind, Placebo-Controlled Trial. *PLoS ONE* 10(5): e0127719. doi:[10.1371/journal.pone.0127719](https://doi.org/10.1371/journal.pone.0127719)

**Published:** May 4, 2015

**Copyright:** © 2015 The PLOS ONE Staff. This is an open access article distributed under the terms of the [Creative Commons Attribution License](https://creativecommons.org/licenses/by/4.0/), which permits unrestricted use, distribution, and reproduction in any medium, provided the original author and source are credited.
